# Supplementary material for: Mechanistic insights into a TIMP3-sensitive pathway constitutively engaged in the regulation of cerebral hemodynamics
Source: eLife. 2016 Aug 1;5:e17536. doi: 10.7554/eLife.17536 (PMC4993587; doi:10.7554/eLife.17536)
Supplement: Figure 1—source data 3. — DOI: http://dx.doi.org/10.7554/eLife.17536.006 [file elife-17536-fig1-data3.xlsx]

## Sheet: Fig1
Figure 1 and figure supplement Source Data 3
B- Resting flow
Vehicle	TIMP3 (8nm)	TIMP3 (40nM)	TIMP1	TIMP2		CBF responses during superfusion of the cranial window with Ringers’ solution containing the appropriate vehicle of TIMP1, TIMP2 and TIMP3 have been pooled in a single column entitled “Vehicle”
95.671	117.195	90.8127	90.6667	106.159
91.342	114.692	92.7419	106.763	101.646
116.017	112.313	96.9466	103.937	93.5114
98.2684	113.216	95.4918	106.977	114.286
98.7013	108.772	90.5138	119.431	102.888
109.69
96.124
101.55
94.5737
98.062
101.351
93.2432
114.414
96.8469
95.045
108.429
91.954
98.4674
96.5517
105.747
100.103	113.238	93.3014	105.555	103.698	mean
1.60015	1.38875	1.27209	4.58443	3.36752	SEM
D- Whisker							E- LFP
Vehicle	TIMP3 (8nm)	TIMP3 (40nM)	TIMP1	TIMP2			Vehicle	TIMP3
25	17	9	25	29			1.345	1.25667
24	15	10	28	32			1.19917	1.15167
22	19	10	23	30			1.48167	1.52417
28	20	13	31	28			1.01833	1.13583
31	19	16	26	28			1.35833	1.49333
26							1.2805	1.31233	mean
33							0.0710044	0.0742179	SEM
27
29
26
27
32
25
30
32
27.8	18	11.6	26.6	29.4	mean
0.846933	0.894454	1.28845	1.36386	0.748354	SEM
G- Adenosine						H- Ach
Vehicle	TIMP3 (8nm)	TIMP3 (40nM)	TIMP1	TIMP2		Vehicle	TIMP3 (8nm)	TIMP3 (40nM)	TIMP1	TIMP2
27	18	10	23	25		22	11	10	23	22
26	17	9	23	32		27	14	7	26	28
23	19	8	20	24		21	16	8	20	25
24	18	14	23	28		28	12	12	22	25
29	15	17	21	29		25	14	19	22	27
27						28
26						21
23						23
30						28
28						24
28						24
27						30
22						25
25						24
26						24
25						28
30						27
24						28
24						26
30						26
26.2	17.4	11.6	22	27.6	mean	25.45	13.4	11.2	22.6	25.4	mean
0.550861	0.678254	1.6912	0.632475	1.43531	SEM	0.573699	0.871806	2.13079	0.979826	1.02959	SEM
