# Supplementary material for: Mechanistic insights into a TIMP3-sensitive pathway constitutively engaged in the regulation of cerebral hemodynamics
Source: eLife. 2016 Aug 1;5:e17536. doi: 10.7554/eLife.17536 (PMC4993587; doi:10.7554/eLife.17536)
Supplement: Figure 2—source data 3. — DOI: http://dx.doi.org/10.7554/eLife.17536.012 [file elife-17536-fig2-data3.xlsx]

## Sheet: Figure 2
Figure 2 and Fig suppl -Source data
C- Resting flow					D- Whisker					E- Adenosine					Ach
Vehicle	GW	GI 5mM	GI 20mM		Vehicle	GW	GI 5mM	GI 20mM		Vehicle	GW	GI 5mM	GI 20mM		Vehicle	GW	GI 5mM	GI 20mM
99.8294	109.402	97.3404	103.192		30	18	29	28		30	17	29	27		28	17	28	27
114.761	103.718	103.279	104.918		28	17	26	25		30	18	27	26		29	16	27	28
98.1229	104.783	102.273	99.4318		31	19	29	30		31	20	30	30		29	18	28	28
86.1775	105.941	94.0541	90.2703		27	15	28	27		28	16	28	28		26	15	30	29
101.109	108.861	102.682	101.916		29	20	29	28		30	20	30	30		28	19	29	28
89.1841					28					29					29
115.749					27					28					26
83.4915					30					30					29
87.7609					28					27					27
123.814					27					28					27
100	106.541	99.9256	99.9455	mean	28.5	17.8	28.2	27.6	mean	29.1	18.2	28.8	28.2	mean	27.8	17	28.4	28	mean
4.20803	1.11784	1.80986	2.57901	SEM	0.430426	0.860259	0.583113	0.812429	SEM	0.386283	0.800024	0.583113	0.800024	SEM	0.369048	0.707128	0.509917	0.316237	SEM
CBF responses during superfusion of the cranial window with Ringers’ solution containing the appropriate vehicle of GW and GI have been pooled in a single column entitled “Vehicle”
F- Whisker				G- Adenosine				Ach
WT	Adam17 ex/+	ADAM17ex/ex		WT	Adam17 ex/+	ADAM17ex/ex		WT	Adam17 ex/+	ADAM17ex/ex
26	16.5	10		27	16.5	10		25	15	9
26	18	11		27	17	12		25.5	18	10
25	14	11		25	16	12		24.5	15	11
27	17	9		27	18	10		26	15.5	9
24	15	9		26	17	11		24	16	10
25.6	16.1	10	mean	26.4	16.9	11	mean	25	15.9	9.8	mean
0.456084	0.638768	0.400012	SEM	0.357782	0.296657	0.400012	SEM	0.316237	0.498011	0.334674	SEM
H-Resting flow (relative changes)					I- Whisker					J-Adenosine					Ach
WT		Adam17 ex/+			WT		Adam17 ex/+			WT		Adam17 ex/+			WT		ADAM17 ex/+
vehicle	sADAM17	vehicle	sADAM17		vehicle	sADAM17	vehicle	sADAM17		vehicle	sADAM17	vehicle	sADAM17		vehicle	sADAM17	vehicle	sADAM17
101	103.9	118	109.6		26	25	16.5	24		27	27	16.5	24		25	26	15	23
86.9	106.5	109.5	107.8		26	26	18	23		27	27	17	24		25.5	26	18	25
89.5	109.2	84.4	116.3		25	25	14	25		25	25	16	26		24.5	24	15	25
113.4	111.9	93.4	110.7		27	27	17	27		27	28	18	26		26	27	15.5	27
109	102	94.8	109.5		24	26	15	25		26	26	17	27		24	25	16	24
99.96	106.7	100.02	110.78	mean	25.6	25.8	16.1	24.8	mean	26.4	26.6	16.9	25.4	mean	25	25.6	15.9	24.8	mean
4.66238	1.59077	5.39723	1.30216	SEM	0.456084	0.334674	0.638768	0.593314	SEM	0.357782	0.456084	0.296657	0.536673	SEM	0.316237	0.456084	0.498011	0.593314	SEM
K-Resting flow relative values)					L- Whisker					M-Adenosine					Ach
WT		TgBACTIMP3			WT		TgBACTIMP3			WT		TgBACTIMP3			WT		TgBACTIMP3
vehicle	sADAM17	vehicle	sADAM17		vehicle	sADAM17	vehicle	sADAM17		vehicle	sADAM17	vehicle	sADAM17		vehicle	sADAM17	vehicle	sADAM17
97.7	106.9	114.6	104.76		23	29	17	26		25	31	16	22		27	25	18	23
104.88	96.5	91.41	151.49		34	25	19	24.5		30	32	17	20		26	26	18	21
102.79	119.4	107.09	118.47		28	27	19	29		27	25	19	27		23	25	15	25
96.94	114	93.45	145.99		27	24	14	23		25	28	15	24		21	25	13	22
99.86	106.3	93.45	147.45		22	25	17	27		22	22	17	26		26	28	17	23
95.27	125.5				24	21				26	27				25	23
99.5733	111.433	100	133.632	mean	26.3333	25.1667	17.2	25.9	mean	25.8333	27.5	16.8	23.8	mean	24.6667	25.3333	16.2	22.8	mean
1.50088	4.23497	2.89171	6.02402	SEM	1.80159	1.10827	0.915233	1.0293	SEM	1.07776	1.52236	0.633738	1.20237	SEM	0.91912	0.6668	0.863508	0.661534	SEM
Resting flow (absolute values)-LDF units					Resting flow (absolute values) -LDF units
WT		Adam17 ex/+			WT		TgBACTIMP3
vehicle	sADAM17	vehicle	sADAM17		vehicle	sADAM17	vehicle	sADAM17
233	242	249	273		232	248	168	176
200	213	231	249		254	245	134	203
206	225	178	207		253	302	157	186
261	292	197	218		229	261	137	200
251	256	200	219		237	252	137	202
					231	290
230.2	245.6	211	233.2	mean	241	261.6	146.6	193.4	mean
12.0145	13.7139	12.7479	12.1511	SEM	4.61009	9.76128	6.74261	5.32557	SEM
