# Supplementary material for: Mechanistic insights into a TIMP3-sensitive pathway constitutively engaged in the regulation of cerebral hemodynamics
Source: eLife. 2016 Aug 1;5:e17536. doi: 10.7554/eLife.17536 (PMC4993587; doi:10.7554/eLife.17536)
Supplement: Figure 3—source data 3. — DOI: http://dx.doi.org/10.7554/eLife.17536.018 [file elife-17536-fig3-data3.xlsx]

## Sheet: Figure3
Figure 3- Source data 1
C- Resting flow						D- Whisker						E- Adenosine
Vehicle	AG1478 10mM	AG1478 20mM	AG825 50mM	AG825 200mM		Vehicle	AG1478 10mM	AG1478 20mM	AG825 50mM	AG825 200mM		Vehicle	AG1478 10mM	AG1478 20mM	AG825 50mM	AG825 200mM
94.6815	94.1799	89.418	93.2099	92.5926		21	19	14	27.5	26		25	18	13	25	28
90.5903	82.1256	77.7778	92.9032	100		26	17	14	30	27		27	18	16	30	29.5
83.5769	103.39	108.475	102.797	97.9021		31	22	16	30	31		32	21	16	29	31
81.239	97.9167	107.812	102.158	103.597		28	19	18	29	29		27	16	17	30	29
83.5769	94.6078	93.6274	112.587	109.79		31.5	18	14	30	28		30	19	15	29	30
110.462						24						28
120.982						26						30
103.448						31						30
112.215						28						30
119.228						27						28
100	94.444	95.4221	100.731	100.776	mean	27.35	19	15.2	29.3	28.2	mean	28.7	18.4	15.4	28.6	29.5	mean
4.81794	3.49243	5.80742	3.63825	2.87275	SEM	1.05432	0.836685	0.800024	0.489913	0.860259	SEM	0.650698	0.812429	0.678254	0.92739	0.500015	SEM
F- Resting flow									G- Whisker									H- Adenosine									Ach
Vehicle	IgG1~Fc	ERBB1~Fc	IgG2a~Fc	ERBB4~Fc	IgG1-IgG2a~Fc	ERBB1-ERBB4~Fc	ERBB3~Fc		Vehicle	IgG1~Fc	ERBB1~Fc	IgG2a~Fc	ERBB4~Fc	IgG1-IgG2a~Fc	ERBB1-ERBB4~Fc	EBB3~Fc		Vehicle	IgG1~Fc	ERBB1~Fc	IgG2a~Fc	ERBB4~Fc	IgG1-IgG2a~Fc	ERBB1-ERBB4~Fc	ERBB3~Fc		Vehicle	IgG1~Fc	ERBB1~Fc	IgG2a~Fc	ERBB4~Fc	IgG1-IgG2a~Fc	ERBB1-ERBB4~Fc	ERBB3~Fc
100	96.5812	116.144	102.37	116.597	112.974	100.781	92.5532		30	28	18	28	19	28	18	25		30	31	19	28	21	31	20	27		27	29	20	29	20	30	18	26
96.1539	106.667	111.017	95.2128	117.447	78.5525	106.18	115.094		31	29.5	16	30	20	31	19	26		30	28	20	28	21	32	20	29		28	27	17	30	21	30	20	27.5
85.8974	108.955	117.143	104.527	113.004	93.9982	104.225	102.381		30	27	19	27	22	30	20	25		28	31	20	27	20	29	17	26		30	28.5	19	28	20.5	29	17	27
118.376	102.166	110.714	97.8261	119.231	125.772	104.912	109.028		27	29	21	27	19.5	28	16	29		30	28	22	29	21	30	18	30		27	26	20	28	20	27	16	27
99.5726	105.579	109.005	102.575	105.851	82.083	108.602	99.3464		26	25	19	28	22	27	17	27		27	27	21	30.5	22	31	16.5	25		30	30	19.5	29	21	28	17	25
98.4982									26									29									29
104.24									28									29									26
92.7562									29									29									27
111.307									28									31									25
93.1979									26									29									26
95.4751									28									29									29
85.0679									31									29									29
109.955									28									29									30
104.072									28									28									29
105.43									28									30									29
110.046									28									30									27
107.306									30									30									30
101.826									30									29									27
94.9772									26									28									28
85.8448									30									31									29.5
115.763									24									28									28
97.9064									27									29									25
103.448									23									26									24
88.67									28									31									29
94.2118									25									27									26
100	103.99	112.804	100.502	114.426	98.6761	104.94	103.681	mean	27.8	27.7	18.6	28	20.5	28.8	18	26.4	mean	29.04	29	20.4	28.5	21	30.6	18.3	27.4	mean	27.78	28.1	19.1	28.8	20.5	28.8	17.6	26.5	mean
1.8243	2.15136	1.61209	1.71936	2.37153	9.05792	1.27977	3.89344	SEM	0.420317	0.800024	0.812429	0.547739	0.632475	0.734869	0.707128	0.748354	SEM	0.25482	0.836685	0.509917	0.591626	0.316237	0.509917	0.734869	0.92739	SEM	0.351283	0.714165	0.556793	0.374177	0.223614	0.583113	0.678254	0.447227	SEM
I- Resting flow					J- Whisker					K- Adenosine					Ach
Vehicle	Heparin	p21 peptide	p21mut peptide		Vehicle	Heparin	p21 peptide	p21mut peptide		Vehicle	Heparin	p21 peptide	p21mut peptide		Vehicle	Heparin	p21 peptide	p21mut peptide
112.435	116.129	94.2675	95.7831		30	20	21	29		30	21	20	30		27	19	23	27
87.0466	116.667	101.704	100.549		28	19	23	28		30	21	24	29		29	21	22	26
97.4093	113.83	104.196	102.632		31	19	20	29		30	20	22	31		27	19.5	22	31
122.28	101.271	100.633	97.9167		27	21	20	28		30	22	23	27		28	20	21	29
80.829	116.667	104.945	99.3711		31	22	19	26		27	20	20	30		30	21	19.5	27
96.201					28					30					28
107.843					31					31					30
87.6226					29					31					30
96.8137					31					31					28
111.52					30					31					28
103.362					30					30					29
113.325					29					29					27
94.6451					27					31					30
89.6638					31					28					28
99.0037					27					27					25
100	112.913	101.149	99.2504	mean	29.3333	20.2	20.6	28	mean	29.7333	20.8	21.8	29.4	mean	28.2667	20.1	21.5	28	mean
2.90506	2.95724	1.89245	1.16054	SEM	0.397163	0.583113	0.678254	0.547739	SEM	0.346754	0.374177	0.800024	0.678254	SEM	0.359398	0.400012	0.591626	0.894454	SEM
