# Supplementary material for: Mechanistic insights into a TIMP3-sensitive pathway constitutively engaged in the regulation of cerebral hemodynamics
Source: eLife. 2016 Aug 1;5:e17536. doi: 10.7554/eLife.17536 (PMC4993587; doi:10.7554/eLife.17536)
Supplement: Figure 4—source data 3. — DOI: http://dx.doi.org/10.7554/eLife.17536.023 [file elife-17536-fig4-data3.xlsx]

## Sheet: Figure 4
Figure 4 - Source data 3
A- Resting flow					B- Whisker					C- Adenosine
Vehicle	Hb-EGF	AG1478 10mM+Hb-EGF	AG1478 20mM /Hb-EGF		Vehicle	Hb-EGF	AG1478 10mM+Hb-EGF	AG1478 20mM +Hb-EGF		Vehicle	Hb-EGF	AG1478 10mM+Hb-EGF	AG1478 20mM +Hb-EGF
84.7526	111.962	104.306	97.1292		22	23	18	14		23	24	17.5	15
109.895	112.177	109.963	104.059		25	25	19	15		25	27	21	16
92.4574	95.1754	87.2807	86.4035		24	25	18	14		26	26	20	14
114.761	105.3	100.353	97.5265		27	25	20	15		27	26	21	14
98.1346	107.851	98.7603	95.4545		23	22	18	14		24	25	18	15
100	106.493	100.133	96.1145	mean	24.2	24	18.6	14.4	mean	25	25.6	19.5	14.8	mean
5.51666	3.11112	3.74952	2.83626	SEM	0.860259	0.632475	0.400012	0.244956	SEM	0.707128	0.509917	0.741642	0.374177	SEM
D- Resting flow					E- Whisker					F- Adenosine					Fig Suppl Ach
Vehicle	TIMP3	TIMP3 +Hb-EGF			Vehicle	TIMP3	TIMP3 +Hb-EGF			Vehicle	TIMP3	TIMP3 +Hb-EGF			Vehicle	TIMP3	TIMP3 +Hb-EGF
105.608	89.823	83.1858			28	14	25			29	14	28			30	15	26
114.019	97.9508	100			30	12	28			31	14	29			30	13	27
95.3271	93.6274	100.98			25	15	24			27	16	27			26	15	24
97.1963	91.8269	103.846			29.5	17	26			31	18	29			28	17	26
87.8505	91.4894	104.255			27	14	26			29	15	27			27	13	25
100	92.9435	98.4535	mean		27.9	14.4	25.8	mean		29.4	15.4	28	mean		28.2	14.6	25.6	mean
4.50167	1.39	3.90281	SEM		0.900027	0.812429	0.663345	SEM		0.748354	0.748354	0.447227	SEM		0.800024	0.748354	0.509917	SEM
G- Resting flow					H- Whisker					I- Adenosine					Fig Suppl Ach
Vehicle	GW	GW +Hb-EGF			Vehicle	GW	GW +Hb-EGF			Vehicle	GW	GW +Hb-EGF			Vehicle	GW	GW +Hb-EGF
99.8294	109.402	116.667			30	18	26			30	17	28			28	17	27
114.761	103.718	114.498			28	17	27			30	18	29			29	16	29
98.1229	104.783	112.609			31	19	29			31	20	30			29	18	30
86.1775	105.941	110.891			27	15	27			28	16	28			26	15	25
101.109	108.861	113.08			29	20	30			30	20	30			28	19	27
100	106.541	113.549	mean		29	17.8	27.8	mean		29.8	18.2	29	mean		28	17	27.6	mean
4.54841	1.11784	0.969287	SEM		0.707128	0.860259	0.734869	SEM		0.489913	0.800024	0.447227	SEM		0.547739	0.707128	0.871806	SEM
