# Supplementary material for: Mechanistic insights into a TIMP3-sensitive pathway constitutively engaged in the regulation of cerebral hemodynamics
Source: eLife. 2016 Aug 1;5:e17536. doi: 10.7554/eLife.17536 (PMC4993587; doi:10.7554/eLife.17536)
Supplement: Figure 5—source data 2. — DOI: http://dx.doi.org/10.7554/eLife.17536.028 [file elife-17536-fig5-data2.xlsx]

## Sheet: Feuil1
Figure 5	Myogenic tone
Fig5-C
Pressure	Vehicle						mean	SEM		Pressure	TIMP2						mean	SEM		Pressure	TIMP3						mean	SEM
20	3.69061	4.57897	2.88143	5.04138	6.21025	3.13636	4.2565	0.516595		20	2.92607	2.19424	4.90639	2.05358	2.66068	5.56573	3.38445	0.605541		20	1.2942	0.539846	5.33397	3.17986	2.24653	5.56115	3.02593	0.848012
40	12.1817	7.17075	10.2899	11.0203	14.9838	11.0052	11.1086	1.03886		40	10.7948	13.9718	6.75047	7.49607	12.8171	13.5327	10.8938	1.27642		40	2.92043	2.01748	8.06937	7.98613	6.66874	8.57378	6.03932	1.16404
60	23.9278	17.3953	16.7631	18.3146	23.0579	20.6648	20.0206	1.22935		60	23.7021	20.6017	22.8263	15.5056	20.4442	21.3054	20.7309	1.1686		60	7.31359	5.92151	11.2237	10.5515	11.0525	11.3551	9.56965	0.957363
80	27.343	25.2433	20.1722	27.1298	28.2048	26.8034	25.8161	1.19635		80	26.1416	26.5598	25.5111	20.6401	24.6311	26.8956	25.0632	0.943783		80	10.2694	8.26612	12.0961	12.5773	12.4914	13.5931	11.5489	0.792582
100	26.09	25.14	23.03	28.98	22.23	28.12	25.5983	1.09853		100	28.3856	20.2697	27.4637	24.2163	21.8979	24.5626	24.466	1.27338		100	9.15832	8.19902	7.27871	10.2338	13.956	12.3018	10.188	1.03539
Fig5- D and E
GW413333X							mean	SEM		GI 254023X							mean	SEM		DMSO (vehicle GW /GI and AG1478)							mean	SEM		AG1478							mean	SEM
20	3.57143	2.75862	5.46875	5.26316	4.54545	0.70922	3.71944	0.733449		20	9.35252	11.3636	9.09091	13.1944	11.0294	5.30303	9.88899	1.10108		20	14.7059	13.6	5	6.33803	6.4	5.88235	8.65438	1.75692		20	7.24638	2.27273	5.40541	1.47059	1.44928	6.55738	4.06696	1.07903
40	14.2045	8.67052	17.284	7.83133	17.6829	14.6199	13.3822	1.72217		40	25.2941	20.8589	25.9259	23.1638	18.9655	18.5629	22.1285	1.28923		40	29.4118	24.8408	25.1656	19.5402	25	18.3673	23.7209	1.66868		40	12.0482	3.84615	14.0541	10.3659	10.9827	22.2222	12.2532	2.4399
60	9.94764	15.1042	13.7931	13.369	14.7059	15.7609	13.7801	0.844574		60	28.8043	32.0442	30.7263	31.1558	30.4124	30.4348	30.5963	0.435875		60	27.933	23.2143	28.0488	22.2826	27.1084	31.3253	26.6521	1.37322		60	7.95455	9.20245	11.1675	14.7727	15.3846	19.209	12.9485	1.73817
80	2.01005	16.5	5.02793	15.3061	12.7168	15.2632	11.1373	2.49239		80	29.4737	30.4348	32.973	32.0388	32.5	33.1579	31.763	0.606591		80	28.022	23.1214	31.1765	20.2128	30.2326	31.7919	27.4262	1.93188		80	2.1978	7.18563	4.87805	15.7609	16.7568	10.2703	9.50823	2.39834
100	1.90476	14.5631	2.73224	13.4328	11.3636	12.3711	9.39462	2.28258		100	27.8351	26.3441	34.7368	32.7014	33.4951	33.1606	31.3789	1.39773		100	22.1622	22.1591	31.4286	20.4188	28.8136	32.7684	26.2918	2.18612		100	2.13904	7.05882	1.89573	10.2151	15.9574	5.31915	7.09754	2.18391
Fig5 -F
Pressure	Control peptide (p21 mut)						mean	SEM		Pressure	Peptide p21								mean	SEM
20	10.77	14.07	10	12.5	15.32	12.06	12.4533	0.813402		20	3.05	1.56	3.79	8.4	3.08	2.03	7.69	6.67	4.53375	0.939874
40	25.48	25.77	22.84	28.77	19.5	29.71	25.345	1.54327		40	4.29	11.8	17.58	17.79	18.18	19.02	17.2	15.75	15.2012	1.74636
60	29.48	21.71	21.97	30.57	19.66	30.05	25.5733	2.02645		60	2.33	9.09	14.61	10.86	16	15.9	19.08	10.19	12.2575	1.86236
80	26.82	13.89	15	30.49	18.13	27.27	21.9333	2.9035		80	2.27	6.11	5.98	1.11	3.33	7.32	8.38	3.05	4.69375	0.920401
100	26.78	12.02	13.59	26.95	17.84	19.7	19.48	2.59649		100	1.66	4.92	1.59	0	0	1.9	4.92	1.2	2.02375	0.681252
Fig 5-G and H
Pressure	TIMP3						mean	SEM		Pressure	TIMP3 +HbEgf						mean	SEM		Pressure	vehicle						mean	SEM		Pressure	HbEgf						mean	SEM
20	3.05	5.76	5.15	5.07	2.88	3.7	4.26833	0.496079		20	8.15	8.84	6.99	7.63	3.17	8.39	7.195	0.846297		20	12.69	14.29	7.81	5.56	12.08	5.92	9.725	1.53511		20	11.19	9.77	15.56	12.59	9.76	5.74	10.7683	1.33885
40	6.63	8.52	8.75	8.82	10.91	8.33	8.66	0.558251		40	14.11	11.41	12.71	14.63	15.48	13.87	13.7017	0.590442		40	22.5	20.86	19.25	14.61	23.53	16.85	19.6	1.39105		40	22.35	18.83	29.94	27.11	19.75	22.01	23.3317	1.76812
60	8.47	11.48	11.49	11.11	10.86	10.34	10.625	0.465387		60	19.43	16.83	18	21.14	20.61	19.25	19.21	0.654944		60	23.7	23.26	22.16	21.13	24.72	23.16	23.0217	0.508081		60	24.6	22.7	26.4	26.7	22.16	24.12	24.4467	0.759602
80	9.39	12.23	11.24	10.81	5.56	10.95	10.03	0.968859		80	19.44	19.62	20.67	25	17.75	21.65	20.6883	1.01426		80	24.16	23.43	21.11	20.79	22.4	22.56	22.4083	0.530511		80	22.16	19.05	22.65	23.33	21.05	21.26	21.5833	0.614613
100	10.33	14.14	10	11.58	3.16	5.56	9.12833	1.65043		100	19.13	21.03	21.33	19.59	14.77	18.69	19.09	0.963783		100	21.98	21.79	18.92	16.5	16.04	19	19.0383	1.02772		100	19.19	18.39	21.2	16.85	17.82	16.85	18.3833	0.673532
Pressure	GW & HbEgf						mean	SEM		Pressure	GW413333X						mean	SEM
20	7.14	8.15	6.2	6.58	9.16	7.19	7.40333	0.442963		20	1.32	5.04	4.69	2.21	4.41	4.38	3.675	0.622565
40	18.52	19.88	18.59	15.63	21.52	19.16	18.8833	0.792289		40	13.76	16.29	15.38	10.24	6.25	10.65	12.095	1.53713
60	21	22.73	21.18	22.97	23.26	21.98	22.1867	0.388456		60	16.34	11.05	16.18	13.66	4.12	11.73	12.18	1.84373
80	20	20.44	22.41	24.42	22.47	20.21	21.6583	0.711542		80	5.31	4.08	12.29	10.7	3.49	10.33	7.7	1.56583
100	15.71	20.21	20.9	22.07	19.57	19.17	19.605	0.884876		100	0.47	0.5	7.69	5.24	3.43	7.49	4.13667	1.32008
Fig 5-I
Pressure	Adam17+/+						mean	SEM		Pressure	Adam17+/+ and HbEgf						mean	SEM		Pressure	Adam17ex/+						mean	SEM		Pressure	Adam17ex/+ and HbEgf						mean	SEM
20	7.14	3.2	2.38	6.25	6.92	7.09	5.49667	0.872354		20	9.82	9.6	7.14	8.59	9.23	9.45	8.97167	0.404666		20	7.55	3.77	4.27	5.31	6.96	6.96	5.80333	0.644477		20	10.38	6.6	7.69	7.08	9.57	8.7	8.33667	0.601278
40	15.71	15.33	16	15.23	17.33	20	16.6	0.747027		40	20	20	19.33	20.53	19.33	21.33	20.0867	0.311111		40	11.2	10.53	12.14	14.49	11.59	11.89	11.9733	0.553781		40	13.6	15.04	21.43	16.67	16.67	14.69	16.35	1.12636
60	22	23.53	22.02	22.16	22.7	22.7	22.5183	0.240526		60	23.33	24.71	23.81	22.75	23.93	22.7	23.5383	0.314583		60	16.43	16.33	16.67	18.79	15.69	16.13	16.6733	0.444293		60	21.43	19.73	22.67	21.48	20.26	16.77	20.39	0.837325
80	21.43	21.14	20.23	19.77	22.62	22.35	21.2567	0.460597		80	20.78	20.57	19.65	18.02	23.21	20	20.3717	0.694197		80	14.48	15.79	19.61	17.76	15.82	15.72	16.53	0.750919		80	13.79	15.79	20.92	19.08	17.72	17.61	17.485	1.01575
100	20.25	19.89	17.51	15.73	20.47	19.19	18.84	0.759779		100	18.35	19.34	17.51	14.61	21.05	15.12	17.6633	1.00961		100	12.08	11.54	20.65	17.53	14.2	15.95	15.325	1.41131		100	11.41	10.26	16.77	15.58	14.2	16.56	14.13	1.11613
