# Supplementary material for: Mechanistic insights into a TIMP3-sensitive pathway constitutively engaged in the regulation of cerebral hemodynamics
Source: eLife. 2016 Aug 1;5:e17536. doi: 10.7554/eLife.17536 (PMC4993587; doi:10.7554/eLife.17536)
Supplement: Figure 6—source data 2. — DOI: http://dx.doi.org/10.7554/eLife.17536.033 [file elife-17536-fig6-data2.xlsx]

## Sheet: Figure 6
Figure 6
A- myogenic tone
pressure	TgNotch3R169C + ADAM17							mean	SEM		pressure	TgNotch3R169C+ vehicle					mean	SEM
20	3.44828	8.33333	6.15212	3.27869	13.6364	7.14286	6.89655	6.98403	1.31867		20	6.03448	4.91803	6.14035	5.98291	5.71429	5.75801	0.221442
40	24.1379	10.8696	22.7567	20.8333	30.8271	18.2432	19.1781	20.978	2.30466		40	20.2797	14.2857	11.9403	13.3803	10.4839	14.074	1.68051
60	25.6757	16.5517	26.0305	24.5161	35.1724	25.8065	25.641	25.6277	2.04074		60	20	17.931	17.931	15.894	13.7405	17.0993	1.06145
80	25.6579	18.7919	22.0855	26.25	36.8421	25.7862	23.9264	25.62	2.11768		80	15.0327	8.78378	17.3333	10.3896	10.4478	12.3974	1.61558
100	21.4286	13.9073	13.5367	23.3129	27.7419	15.8537	13.7725	18.5076	2.13943		100	2.5	8	15.0327	6.36943	8.0292	7.98626	2.02944
pressure	NonTg + vehicle						mean	SEM			pressure	nonTg + ADAM17					mean	SEM
20	5.9322	7.31707	8.06452	3.27869	6.56934	12.5	7.27697	1.24118			20	1.62602	12.037	6.55738	16.0584	11.7647	9.60871	2.50185
40	23.0769	20.915	21.519	18.4713	13.4969	20.6061	19.6809	1.37862			40	11.6883	18.6047	26.7516	27.2727	18.75	20.6135	2.9086
60	24.0964	23.8095	26.2857	26.7045	19.7674	24.8649	24.2547	1.0144			60	22.807	24.1379	26.7442	22.8723	22.6744	23.8472	0.770893
80	22.5434	22.093	24.8619	27.5676	17.1429	24.0838	23.0487	1.42421			80	21.0227	18.543	21.5909	21.2435	20.7865	20.6373	0.54009
100	16.8539	20	22.7027	26.3158	8.47458	20	19.0578	2.48109			100	19.4444	12.1019	18.3333	19.5876	19.8895	17.8714	1.46621
B-Resting flow (relative changes)					C-Whisker					D-Adenosine					Resting flow (absolute values)-LDF units
WT		TgN3R169C			WT		TgN3R169C			WT		TgN3R169C			WT		TgN3R169C
Vehicle	sADAM17	Vehicle	sADAM17		Vehicle	sADAM17	Vehicle	sADAM17		Vehicle	sADAM17	Vehicle	sADAM17		Vehicle	sADAM17	Vehicle	sADAM17
97.77	106.9	110.4	133.7		23	29	13	20		25	31	18	22		232	248	193	258
104.88	96.5	108.1	122.2		34	25	14	20		30	32	9	21		254	245	189	231
102.79	119.4	92.1	141		28	27	18	27		27	25	17	23		253	302	161	227
96.94	114	96.7	158		27	24	14.5	23		25	28	16	22		229	261	169	267
99.86	106.3	92.7	145.1		22	25	13	20		22	22	17	25		237	252	162	235
95.27	125.5				24	21				26	27				231	290
99.585	111.433	100	140	mean	26.3333	25.1667	14.5	22	mean	25.8333	27.5	15.4	22.6	mean	241	261.6	174.8	243.6	mean
1.49801	4.23497	3.87542	5.94804	SEM	1.80159	1.10827	0.921982	1.37845	SEM	1.07776	1.52236	1.631	0.678254	SEM	4.61009	9.76128	6.78548	7.94757	SEM
E-Resting flow (relative changes)					F-Whisker					G-Adenosine					Resting flow (absolute values)-LDF units
WT		TgN3R169C			WT		TgN3R169C			WT		TgN3R169C			WT		TgN3R169C
Vehicle	HB-EGF	Vehicle	HB-EGF		Vehicle	HB-EGF	Vehicle	HB-EGF		Vehicle	HB-EGF	Vehicle	HB-EGF		Vehicle	HB-EGF	Vehicle	HB-EGF
86	106.6	115	114.3		22	23	12.5	21		23	24	15	22		213	227	189	216
111.4	108.3	82.7	116.2		25	25	14	23		25	27	15	25		276	299	136	158
91.2	88.5	105.2	115.6		24	25	15	20		26	26	16	22		226	200	173	200
113	104.3	102.2	108.3		27	25	13	20		27	26	14	21		280	292	168	182
98.5	104.9	94.9	106.4		23	22	16	21		24	25	16.5	23		244	256	156	166
							15	21				16	22
100.02	102.52	100	112.16	mean	24.2	24	14.25	21	mean	25	25.6	15.4167	22.5	mean	247.8	254.8	164.4	184.4	mean
5.36042	3.57396	5.39544	2.01019	SEM	0.860259	0.632475	0.544014	0.447303	SEM	0.707128	0.509917	0.374612	0.562844	SEM	13.291	18.8616	8.85803	10.6849	SEM
