# Supplementary material for: Mechanistic insights into a TIMP3-sensitive pathway constitutively engaged in the regulation of cerebral hemodynamics
Source: eLife. 2016 Aug 1;5:e17536. doi: 10.7554/eLife.17536 (PMC4993587; doi:10.7554/eLife.17536)
Supplement: Figure 7—source data 2. — DOI: http://dx.doi.org/10.7554/eLife.17536.037 [file elife-17536-fig7-data2.xlsx]

## Sheet: Current densities-Fig7 & Suppl1
Figure 7 -Source data
Fig7- Panel C - Current densities
Voltage (mV)	-70				-60				-50				-40				-30				-20				-10				0				10				20				30				40				50
Mouse strain	TgN3R169C	TgN3R169C;TIMP3+/-			TgN3R169C	TgN3R169C;TIMP3+/-			TgN3R169C	TgN3R169C;TIMP3+/-			TgN3R169C	TgN3R169C;TIMP3+/-			TgN3R169C	TgN3R169C;TIMP3+/-			TgN3R169C	TgN3R169C;TIMP3+/-			TgN3R169C	TgN3R169C;TIMP3+/-			TgN3R169C	TgN3R169C;TIMP3+/-			TgN3R169C	TgN3R169C;TIMP3+/-			TgN3R169C	TgN3R169C;TIMP3+/-			TgN3R169C	TgN3R169C;TIMP3+/-			TgN3R169C	TgN3R169C;TIMP3+/-			TgN3R169C
n = 1	0.19618	0.140917			0.24329	0.21462			0.27014	0.318483			0.64327	0.368086			1.72775	0.481621			4.56263	1.72788			9.15861	2.35819			15.9103	4.5133			23.0795	5.40392			30.8461	6.55939			38.0577	9.08796			41.7762	11.7948			43.9483
2	0.22235	0.617081			0.63254	0.679293			0.51405	0.777072			1.11862	0.676687			2.24288	1.12512			4.18495	1.54344			6.37997	2.37599			10.2508	4.06611			14.2844	6.54847			18.5339	9.2327			21.6745	13.0569			29.0319	16.3288			33.8413
3	0.09553	0.0381359			0.27684	0.150663			0.23863	0.353202			0.49966	0.373038			1.01828	0.605946			2.481	1.05859			4.91902	2.69747			8.26764	5.25132			11.4778	9.49153			18.2615	15.1039			24.4884	20.9768			27.6133	25.0736			29.8115
4	0.26694	0.268598			0.38412	0.384271			0.49822	0.666499			1.02556	0.768754			1.6274	1.10952			3.26612	1.924			5.48831	3.79692			9.56641	6.55244			14.9655	10.1166			21.0226	14.5176			25.4698	18.0641			30.6951	18.844			35.2578
5	0.25837	0.701808			0.51039	1.33912			0.58975	1.66981			1.05517	2.1553			1.48946	2.42643			2.96066	3.46242			4.866	5.26254			8.68823	8.46149			14.392	13.2872			19.6818	17.2251			26.9244	21.1623			31.3234	24.2592			35.343
6	0.16909	0.238205			0.10716	0.225706			0.29017	0.343862			0.59497	0.418278			1.12614	0.815798			2.02688	1.89299			3.68698	4.24922			6.54266	6.76585			11.5191	10.1905			15.4483	12.652			19.4142	15.084			21.9169	18.1588			24.9233
7	0.27232	-0.070987			0.57534	0.0525398			1.01366	0.0670788			1.64669	0.392616			1.89479	1.75687			3.07129	3.56535			5.34093	5.16638			8.99319	9.31679			14.6406	15.2052			19.1983	21.2416			22.8798	26.5107			26.5811	30.9251			29.4343
		0.150553				0.407586				0.867207				1.18323				1.2				3.58518				6.08768				10.2555				15.0977				16.6974				17.4165				18.6329
mean	0.21154	0.260539			0.389954	0.431725			0.487803	0.632901			0.940563	0.791999			1.58953	1.19016			3.22193	2.34498			5.6914	3.9993			9.74561	6.89785			14.9084	10.6676			20.4275	14.1537			25.5584	17.6699			29.8483	20.5022			33.2228
SEM	0.0241865	0.0952612			0.0727082	0.146375			0.101915	0.175904			0.150625	0.218758			0.16122	0.22535			0.337883	0.361932			0.65384	0.507897			1.11717	0.803148			1.46997	1.2933			1.85188	1.64383			2.28485	1.90454			2.31152	2.10704			2.2831
Fig7- panel E - current densities
Voltage (mV)	-70				-60				-50				-40				-30				-20				-10				0				10				20				30				40				50
Mouse strain	TgN3R169C	TgN3R169C + ADAM17			TgN3R169C	TgN3R169C + ADAM17			TgN3R169C	TgN3R169C + ADAM17			TgN3R169C	TgN3R169C + ADAM17			TgN3R169C	TgN3R169C + ADAM17			TgN3R169C	TgN3R169C + ADAM17			TgN3R169C	TgN3R169C + ADAM17			TgN3R169C	TgN3R169C + ADAM17			TgN3R169C	TgN3R169C + ADAM17			TgN3R169C	TgN3R169C + ADAM17			TgN3R169C	TgN3R169C + ADAM17			TgN3R169C	TgN3R169C + ADAM17			TgN3R169C
n = 1	0.19618	0.254713			0.24329	0.221777			0.27014	0.124177			0.64327	0.591606			1.72775	1.28856			4.56263	2.73021			9.15861	4.54237			15.9103	8.66486			23.0795	13.6917			30.8461	18.9012			38.0577	23.4804			41.7762	28.7407			43.9483
2	0.22235	0.303761			0.63254	0.392897			0.51405	0.590422			1.11862	1.08364			2.24288	2.16295			4.18495	3.15812			6.37997	3.96269			10.2508	9.27366			14.2844	14.3155			18.5339	19.4188			21.6745	22.5931			29.0319	26.6499			33.8413
3	0.09553	0.0227585			0.27684	0.258704			0.23863	0.335409			0.49966	0.722292			1.01828	1.10069			2.481	1.75684			4.91902	3.52066			8.26764	5.32857			11.4778	9.15132			18.2615	12.4998			24.4884	15.6628			27.6133	16.274			29.8115
4	0.26694	0.228758			0.38412	0.245697			0.49822	0.523388			1.02556	1.00191			1.6274	1.53718			3.26612	2.75489			5.48831	4.07229			9.56641	7.01103			14.9655	12.4673			21.0226	16.7513			25.4698	19.6021			30.6951	23.8704			35.2578
5	0.25837	0.234692			0.51039	0.583073			0.58975	0.148982			1.05517	1.06227			1.48946	1.48074			2.96066	2.15977			4.866	4.56233			8.68823	6.68532			14.392	8.81026			19.6818	12.9009			26.9244	17.8023			31.3234	21.0833			35.343
6	0.16909	0.165301			0.10716	0.234381			0.29017	0.344873			0.59497	0.598816			1.12614	1.10842			2.02688	2.32763			3.68698	4.29057			6.54266	6.99515			11.5191	12.5719			15.4483	17.5676			19.4142	22.1907			21.9169	24.2925			24.9233
7	0.27232	0.160517			0.57534	0.409584			1.01366	0.7048			1.64669	1.79766			1.89479	1.65454			3.07129	3.84904			5.34093	4.37095			8.99319	6.7295			14.6406	10.0133			19.1983	14.0279			22.8798	17.9259			26.5811	21.1065			29.4343
mean	0.21154	0.195786			0.389954	0.335159			0.487803	0.396007			0.940563	0.979742			1.58953	1.47615			3.22193	2.67665			5.6914	4.18884			9.74561	7.24116			14.9084	11.5745			20.4275	16.0096			25.5584	19.8939			29.8483	23.1453			33.2228
SEM	0.0241865	0.0344493			0.0727082	0.0505198			0.101915	0.0831773			0.150625	0.158047			0.16122	0.139613			0.337883	0.260509			0.65384	0.139659			1.11717	0.500005			1.46997	0.841448			1.85188	1.07871			2.28485	1.10904			2.31152	1.55116			2.2831
Fig7- supplement 1- current densities
Voltage (mV)	-70			-60			-50			-40			-30			-20			-10			0			10			20			30			40			50			60
Mouse strain	Non-Tg	nonTg+TIMP3		Non-Tg	nonTg+TIMP3		Non-Tg	nonTg+TIMP3		Non-Tg	nonTg+TIMP3		Non-Tg	nonTg+TIMP3		Non-Tg	nonTg+TIMP3		Non-Tg	nonTg+TIMP3		Non-Tg	nonTg+TIMP3		Non-Tg	nonTg+TIMP3		Non-Tg	nonTg+TIMP3		Non-Tg	nonTg+TIMP3		Non-Tg	nonTg+TIMP3		Non-Tg	nonTg+TIMP3		Non-Tg	nonTg+TIMP3
1	0.14374	0.271348		0.21365	0.25711		0.29989	0.402346		0.47123	0.476476		0.83668	0.929306		1.52769	2.15638		3.44582	4.15696		6.09655	7.46413		10.8411	11.5242		14.5663	16.5376		17.0453	20.5775		21.7568	22.4659		22.0659	27.8309		23.659	28.9613
2	0.00408	0.043442		0.00702	0.171626		0.22955	0.362796		0.22371	0.424942		0.2876	0.690256		0.87806	1.20588		2.09768	2.70658		4.07419	4.63186		7.6611	7.45961		10.8694	10.5173		13.6198	14.8737		14.1513	18.4617		17.7542	18.8666		21.2702	20.3701
3	0.26414	0.70294		0.34165	0.773808		0.51341	0.885192		0.7423	0.875717		1.58083	1.28167		2.74619	2.46663		4.73093	5.88522		8.08274	9.6388		12.9321	15.136		19.4501	19.6218		24.2963	24.1067		27.1239	29.5622		30.6399	33.978		30.1971	37.3244
4	0.29892	0.30597		0.32496	0.437738		0.75512	0.759234		0.52071	0.77084		0.96384	1.26389		2.32403	2.1917		4.54112	4.32522		8.06405	7.70724		12.4483	11.6084		16.8859	17.2055		19.6462	23.8955		23.1739	28.0345		24.5254	29.6161		25.089	29.1996
5	0.01979	0.160524		0.20381	0.244482		0.29166	0.391706		0.42808	0.447244		0.75712	0.862176		1.39556	1.75819		3.06144	3.07279		4.63354	5.98198		7.95767	10.8122		11.2181	14.4123		15.4803	17.1827		18.3333	20.6854		20.5879	23.8906		21.3123	25.7416
mean	0.146134	0.296845		0.218218	0.376953		0.417926	0.560255		0.477206	0.599044		0.885214	1.00546		1.77431	1.95576		3.5754	4.02935		6.19021	7.0848		10.3681	11.3081		14.598	15.6589		18.0176	20.1272		20.9078	23.8419		23.1147	26.8364		24.3055	28.3194
SEM	0.0605875	0.111455		0.0597756	0.108457		0.0969995	0.108975		0.0833297	0.0933915		0.208083	0.115923		0.335729	0.218891		0.486439	0.557352		0.836734	0.845204		1.10143	1.22161		1.64475	1.53065		1.8547	1.82358		2.19971	2.13429		2.17759	2.5682		1.64186	2.75785
[truncated: 3 more columns]

## Sheet: Current properties-Suppl 2
TgNotch3R169C	Peak	Peak density	I/Imax		Peak	Peak density	I/Imax		Peak	Peak density	I/Imax		Peak	Peak density	I/Imax		Peak	Peak density	I/Imax		Peak	Peak density	I/Imax		Peak	Peak density	I/Imax						Peak density									mean	sem
-70	0.220977	0.0195555	0.00407328		0.419121	0.0590311	0.0153706		1.79548	0.204264	0.0228054		0.597991	0.0657133	0.0148792		0.403087	0.066958	0.0134226		-0.084287	-0.00534477	-0.000549692		-0.024082	-0.00305997	-0.000549692						0.0195555	0.0590311	0.204264	0.0657133	0.066958	-0.00534477	-0.00305997			0.0581595	0.0270593
-60	0.12316	0.0108991	0.00227021		0.508591	0.0716325	0.0186518		2.39844	0.27286	0.0304639		0.371466	0.0408204	0.00924278		-1.61852	-0.268857	-0.0538962		0.785828	0.0498306	0.00512491		0.224522	0.0285289	0.00512491						0.0108991	0.0716325	0.27286	0.0408204	-0.268857	0.0498306	0.0285289			0.0293877	0.0599414
-50	-0.308446	-0.0272961	-0.00568559		1.21876	0.171657	0.0446962		1.38613	0.157694	0.017606		0.187828	0.0206404	0.00467352		-0.087556	-0.0145442	-0.00291558		-1.00526	-0.0637453	-0.00655601		-0.287218	-0.0364953	-0.00655601						-0.0272961	0.171657	0.157694	0.0206404	-0.0145442	-0.0637453	-0.0364953			0.0297014	0.0361663
-40	0.884647	0.0782873	0.0163067		4.04274	0.5694	0.148261		3.31977	0.377675	0.0421662		1.38201	0.151869	0.0343871		2.46593	0.409623	0.0821145		5.12223	0.324808	0.0334055		1.46349	0.185959	0.0334055						0.0782873	0.5694	0.377675	0.151869	0.409623	0.324808	0.185959			0.29966	0.0646135
-30	1.8841	0.166734	0.0347296		7.52793	1.06027	0.276075		4.26603	0.485328	0.0541852		3.03432	0.333442	0.0754997		3.8167	0.634002	0.127094		8.69134	0.551131	0.0566821		2.48324	0.315532	0.0566821						0.166734	1.06027	0.485328	0.333442	0.634002	0.551131	0.315532			0.506634	0.109894
-20	8.3669	0.740434	0.154227		9.83201	1.38479	0.360573		10.1331	1.1528	0.128706		8.7818	0.965033	0.218508		7.59434	1.26152	0.252888		20.3265	1.28894	0.132563		5.80758	0.737939	0.132563						0.740434	1.38479	1.1528	0.965033	1.26152	1.28894	0.737939			1.07592	0.100025
-10	14.5743	1.28976	0.268649		13.6416	1.92135	0.500284		13.6678	1.55492	0.173602		12.0457	1.32371	0.299721		10.8882	1.80868	0.362574		44.5015	2.82191	0.290225		12.7147	1.61559	0.290225						1.28976	1.92135	1.55492	1.32371	1.80868	2.82191	1.61559			1.76228	0.197026
0	22.2088	1.96538	0.409376		17.3597	2.44502	0.636638		28.6596	3.26048	0.364022		20.017	2.19967	0.498061		15.5057	2.57569	0.516332		69.7305	4.42172	0.45476		19.923	2.53151	0.45476						1.96538	2.44502	3.26048	2.19967	2.57569	4.42172	2.53151			2.77135	0.314024
10	33.2057	2.93855	0.612081		20.2283	2.84906	0.741842		42.5331	4.83881	0.540237		23.3823	2.56948	0.581796		18.742	3.11328	0.6241		89.5266	5.67702	0.583863		25.579	3.25019	0.583863						2.93855	2.84906	4.83881	2.56948	3.11328	5.67702	3.25019			3.6052	0.443769
20	41.089	3.6362	0.757395		23.4123	3.29751	0.85861		57.7378	6.56858	0.73336		30.0348	3.30052	0.747322		19.8511	3.29753	0.661035		110.446	7.00353	0.720291		31.5559	4.00964	0.720291						3.6362	3.29751	6.56858	3.30052	3.29753	7.00353	4.00964			4.44479	0.61417
30	45.8603	4.05843	0.845344		25.8283	3.63779	0.947212		63.4864	7.22257	0.806376		37.6623	4.13872	0.937111		18.8947	3.13866	0.629188		123.088	7.80522	0.802742		35.1681	4.46863	0.802742						4.05843	3.63779	7.22257	4.13872	3.13866	7.80522	4.46863			4.92429	0.690063
40	49.4388	4.37512	0.911308		28.3969	3.99956	1.04141		73.1314	8.31984	0.928883		34.9753	3.84344	0.870253		22.8255	3.79161	0.760081		144.927	9.19004	0.945166		41.4077	5.26146	0.945166						4.37512	3.99956	8.31984	3.84344	3.79161	9.19004	5.26146			5.54015	0.856251
50	52.0288	4.60432	0.959049		27.3389	3.85055	1.00261		76.5351	8.70706	0.972114		36.434	4.00374	0.906548		29.4139	4.88602	0.97947		146.727	9.30421	0.956909		41.9221	5.32683	0.956909						4.60432	3.85055	8.70706	4.00374	4.88602	9.30421	5.32683			5.81182	0.848603
60	54.2504	4.80092	1		27.2677	3.84052	1		78.7305	8.95683	1		40.1898	4.41647	1		30.0304	4.98844	1		153.335	9.7232	1		43.81	5.5667	1						4.80092	3.84052	8.95683	4.41647	4.98844	9.7232	5.5667			6.04187	0.878479
TgNotch3R169C +ADAM17	Peak	Peak density	I/Imax		Peak	Peak density	I/Imax		Peak	Peak density	I/Imax		Peak	Peak density	I/Imax		Peak	Peak density	I/Imax		Peak	Peak density	I/Imax		Peak	Peak density	I/Imax
-70	0.591981	0.0523877	0.012708		0.0878746	0.0123767	0.0037877		1.39209	0.158372	0.0318181		0.664605	0.0730335	0.0197313		1.33161	0.214775	0.052934		0.588925	0.0373447	0.00424761		-0.0216738	-0.00275398	-0.000563997						0.0523877	0.0123767	0.158372	0.0730335	0.214775	0.0373447	-0.00275398			0.0779336	0.0302089
-60	0.550755	0.0487394	0.011823		-0.168025	-0.0236655	-0.00724246		2.18802	0.248921	0.0500103		0.724394	0.0796038	0.0215063		1.79855	0.290089	0.0714959		0.756141	0.047948	0.00545364		0.20207	0.025676	0.00525828						0.0487394	-0.0236655	0.248921	0.0796038	0.290089	0.047948	0.025676			0.102473	0.0449441
-50	0.682644	0.060411	0.0146543		-0.958658	-0.135022	-0.0413215		3.7131	0.422424	0.0848684		0.871377	0.0957557	0.0258701		1.00922	0.162778	0.0401186		0.976509	0.0619219	0.00704304		-0.258496	-0.0328458	-0.00672661						0.060411	-0.135022	0.422424	0.0957557	0.162778	0.0619219	-0.0328458			0.0907746	0.0660485
-40	2.20907	0.195493	0.047422		1.14037	0.160615	0.0491539		1.18718	0.13506	0.0271347		0.595681	0.0654594	0.017685		1.48458	0.239448	0.0590149		4.63153	0.293693	0.0334048		1.31714	0.167363	0.0342748						0.195493	0.160615	0.13506	0.0654594	0.239448	0.293693	0.167363			0.17959	0.0277632
-30	3.72024	0.329225	0.0798621		1.04137	0.146672	0.0448866		0.960908	0.109318	0.0219629		0.491603	0.0540223	0.0145951		0.891434	0.14378	0.0354363		8.4328	0.534737	0.0608213		2.23491	0.283979	0.058157						0.329225	0.146672	0.109318	0.0540223	0.14378	0.534737	0.283979			0.228819	0.0627777
-20	5.32278	0.471042	0.114264		3.07879	0.433633	0.132707		3.50401	0.398635	0.0800891		2.9967	0.329307	0.088968		1.81499	0.292741	0.0721496		17.3831	1.10229	0.125375		5.02682	0.638732	0.130808						0.471042	0.433633	0.398635	0.329307	0.292741	1.10229	0.638732			0.523768	0.105294
-10	12.7233	1.12595	0.27313		9.05112	1.27481	0.390135		5.83543	0.663872	0.133377		4.81472	0.52909	0.142943		2.95118	0.475997	0.117315		34.9993	2.21936	0.252431		10.4433	1.32697	0.271755						1.12595	1.27481	0.663872	0.52909	0.475997	2.21936	1.32697			1.08801	0.230952
0	19.1294	1.69287	0.41065		11.9063	1.67695	0.513204		15.9688	1.8167	0.364989		12.9788	1.42624	0.385323		5.84041	0.942001	0.232168		48.4057	3.06948	0.349124		16.9307	2.1513	0.440571						1.69287	1.67695	1.8167	1.42624	0.942001	3.06948	2.1513			1.82508	0.250397
10	31.9577	2.82812	0.686034		14.9003	2.09863	0.642253		21.9751	2.50001	0.502272		19.8726	2.18381	0.589994		9.04628	1.45908	0.359608		59.6808	3.78445	0.430446		21.0211	2.67104	0.547013						2.82812	2.09863	2.50001	2.18381	1.45908	3.78445	2.67104			2.50359	0.273045
20	36.1334	3.19764	0.775673		18.0136	2.53713	0.776449		25.5795	2.91007	0.584657		23.1172	2.54036	0.686321		12.5765	2.02846	0.499939		67.2355	4.26351	0.484934		26.4003	3.35455	0.68699						3.19764	2.53713	2.91007	2.54036	2.02846	4.26351	3.35455			2.97596	0.273194
30	40.4876	3.58297	0.869144		21.5637	3.03715	0.929473		34.6214	3.93873	0.791323		24.0121	2.6387	0.71289		17.582	2.83581	0.698921		84.1216	5.33428	0.606724		30.6513	3.8947	0.797609						3.58297	3.03715	3.93873	2.6387	2.83581	5.33428	3.8947			3.6089	0.346202
40	44.1328	3.90556	0.947396		22.4645	3.16401	0.968297		37.6587	4.28427	0.860744		28.2018	3.0991	0.837277		20.5431	3.31341	0.816631		106.432	6.74899	0.767635		36.2669	4.60825	0.943739						3.90556	3.16401	4.28427	3.0991	3.31341	6.74899	4.60825			4.16051	0.483494
50	41.5279	3.67503	0.891476		22.862	3.22	0.985433		42.9064	4.88127	0.980687		32.5665	3.57873	0.966857		21.3745	3.44751	0.849681		123.763	7.848	0.892637		36.7299	4.66708	0.955787						3.67503	3.22	4.88127	3.57873	3.44751	7.848	4.66708			4.47395	0.610485
60	46.5833	4.12241	1		23.2	3.2676	1		43.7513	4.9774	1		33.6828	3.70141	1		25.156	4.05741	1		138.649	8.79193	1		38.429	4.88297	1						4.12241	3.2676	4.9774	3.70141	4.05741	8.79193	4.88297			4.82873	0.699214
TgNotch3R169C;Timp3+/-	Peak	Peak density	I/Imax		Peak	Peak density	I/Imax		Peak	Peak density	I/Imax		Peak	Peak density	I/Imax		Peak	Peak density	I/Imax		Peak	Peak density	I/Imax		Peak	Peak density	I/Imax		Peak	Peak density	I/Imax
-70	0.065	0.00543478	0.00190797		1.08694	0.153523	0.0383421		-0.894345	-0.0578864	-0.0110954		0.183888	0.0220225	0.00615913		0.865645	0.105566	0.057096		-1.01829	-0.0750399	-0.0181294		0.288174	0.020152	0.00475484		0.05785	0.00683806	0.00184705		0.00543478	0.153523	-0.0578864	0.0220225	0.105566	-0.0750399	0.020152	0.00683806		0.0225763	0.0269209
-60	-2.96172	-0.247636	-0.0869367		1.54464	0.218169	0.0544874		-1.17556	-0.0760883	-0.0145843		0.595543	0.0713225	0.0199471		1.00823	0.122955	0.0665008		-0.432505	-0.0318721	-0.00770022		0.833178	0.0582642	0.0137473		-2.63594	-0.311576	-0.084161		-0.247636	0.218169	-0.0760883	0.0713225	0.122955	-0.0318721	0.0582642	-0.311576		-0.0245577	0.0643069
-50	-1.14996	-0.0961503	-0.0337552		0.851057	0.120206	0.0300212		-1.54222	-0.0998198	-0.0191331		0.743771	0.0890744	0.0249118		1.47432	0.179796	0.0972431		0.136672	0.0100716	0.00243328		0.591321	0.0413511	0.00975673		-1.02346	-0.120977	-0.0326774		-0.0961503	0.120206	-0.0998198	0.0890744	0.179796	0.0100716	0.0413511	-0.120977		0.015444	0.0397442
-40	-1.38921	-0.116155	-0.040778		-0.47725	-0.0674082	-0.0168351		1.23114	0.0796854	0.0152738		0.566893	0.0678914	0.0189875		1.67016	0.203678	0.11016		1.28125	0.0944181	0.0228111		-0.96985	-0.0678217	-0.0160024		-1.2364	-0.146146	-0.0394761		-0.116155	-0.0674082	0.0796854	0.0678914	0.203678	0.0944181	-0.0678217	-0.146146		0.0060178	0.0433143
-30	3.44915	0.28839	0.101244		1.22447	0.172947	0.0431934		2.86773	0.185613	0.0355776		1.27565	0.152772	0.0427265		1.8404	0.224439	0.121388		6.91351	0.50947	0.123086		2.10924	0.147499	0.0348023		3.06974	0.362854	0.0980117		0.28839	0.172947	0.185613	0.152772	0.224439	0.50947	0.147499	0.362854		0.255498	0.044719
-20	4.71655	0.394361	0.138447		3.02164	0.426785	0.106589		9.21666	0.596548	0.114344		1.65985	0.198785	0.055595		3.0483	0.371744	0.201059		17.3147	1.27596	0.308268		7.33581	0.512994	0.12104		4.19773	0.496186	0.134026		0.394361	0.426785	0.596548	0.198785	0.371744	1.27596	0.512994	0.496186		0.53417	0.113859
-10	12.9872	1.08589	0.381219		7.2861	1.02911	0.257019		18.9721	1.22797	0.235371		4.62428	0.553806	0.154885		5.50389	0.671206	0.363024		26.7686	1.97263	0.476582		17.4116	1.2176	0.28729		11.5586	1.36627	0.369047		1.08589	1.02911	1.22797	0.553806	0.671206	1.97263	1.2176	1.36627		1.14056	0.154506
0	13.6973	1.14526	0.402063		12.0086	1.69613	0.423606		35.517	2.29883	0.440631		8.54354	1.02318	0.286157		5.95819	0.726609	0.392989		34.2067	2.52076	0.609007		30.9942	2.16743	0.511401		12.1906	1.44097	0.389225		1.14526	1.69613	2.29883	1.02318	0.726609	2.52076	2.16743	1.44097		1.6274	0.23103
10	25.5262	2.1343	0.749281		15.0496	2.12565	0.530878		48.3738	3.13099	0.600135		15.225	1.82336	0.509946		10.5562	1.28735	0.696266		39.6445	2.92148	0.705821		39.3993	2.7552	0.650085		22.7183	2.68538	0.725357		2.1343	2.12565	3.13099	1.82336	1.28735	2.92148	2.7552	2.68538		2.35796	0.220233
20	24.2297	2.0259	0.711224		21.6247	3.05433	0.762815		60.3792	3.90804	0.749077		21.4986	2.57469	0.720074		14.2658	1.73973	0.940938		46.5822	3.43274	0.829339		45.9169	3.21097	0.757623		21.5644	2.54899	0.688516		2.0259	3.05433	3.90804	2.57469	1.73973	3.43274	3.21097	2.54899		2.81192	0.256965
30	33.4013	2.79275	0.980442		23.7085	3.34865	0.836321		70.1047	4.53752	0.869734		26.3114	3.15107	0.881273		17.4843	2.13223	1.15322		45.7836	3.37389	0.815121		54.1069	3.7837	0.892759		29.7272	3.51385	0.949138		2.79275	3.34865	4.53752	3.15107	2.13223	3.37389	3.7837	3.51385		3.32921	0.2484
40	35.28	2.94983	1.03559		27.566	3.8935	0.972395		75.7444	4.90255	0.939701		28.8586	3.45611	0.966586		15.2643	1.8615	1.0068		53.8628	3.96926	0.958961		56.808	3.97259	0.937326		31.3992	3.71149	1.00252		2.94983	3.8935	4.90255	3.45611	1.8615	3.96926	3.97259	3.71149		3.5896	0.314396
50	38.3839	3.20936	1.1267		30.2542	4.2732	1.06722		81.5041	5.27535	1.01116		30.4534	3.64711	1.02		17.1483	2.09126	1.13106		52.4726	3.86681	0.934209		55.4693	3.87897	0.915238		32.1617	3.80162	1.02687		3.20936	4.2732	5.27535	3.64711	2.09126	3.86681	3.87897	3.80162		3.75546	0.318687
60	34.0676	2.84846	1		28.3485	4.00403	1		80.6048	5.21714	1		29.8562	3.57559	1		15.1612	1.84893	1		56.1679	4.13912	1		60.6065	4.23821	1		31.3202	3.70215	1		2.84846	4.00403	5.21714	3.57559	1.84893	4.13912	4.23821	3.70215		3.6967	0.354653
Non-Tg	Peak	Peak density	I/Imax		Peak	Peak density	I/Imax		Peak	Peak density	I/Imax		Peak	Peak density	I/Imax		Peak	Peak density	I/Imax
-70	0.220977	0.0148906	0.00407328		0.152676	0.0131504	0.00432454		2.14167	0.138619	0.0318181		0.830756	0.0830756	0.0197313		1.29847	0.20943	0.057096														0.0148906	0.0131504	0.138619	0.0830756	0.20943					0.0918333	0.0375539
-60	0.12316	0.00829919	0.00227021		-0.291932	-0.0251448	-0.00826895		3.36618	0.217876	0.0500103		0.905493	0.0905493	0.0215063		1.51235	0.243927	0.0665008														0.00829919	-0.0251448	0.217876	0.0905493	0.243927					0.107101	0.0540912
-50	-0.308446	-0.0207848	-0.00568559		-1.6656	-0.143463	-0.0471781		5.71247	0.369739	0.0848684		1.08922	0.108922	0.0258701		2.21149	0.356691	0.0972431														-0.0207848	-0.143463	0.369739	0.108922	0.356691					0.134221	0.10167
-40	0.884647	0.0596123	0.0163067		1.98131	0.170656	0.0561206		1.82643	0.118216	0.0271347		0.744601	0.0744601	0.017685		2.50524	0.404071	0.11016														0.0596123	0.170656	0.118216	0.0744601	0.404071					0.165403	0.0627213
-30	1.8841	0.126961	0.0347296		1.8093	0.15584	0.0512485		1.47832	0.0956841	0.0219629		0.614504	0.0614504	0.0145951		2.76059	0.445257	0.121388														0.126961	0.15584	0.0956841	0.0614504	0.445257					0.177038	0.0688758
-20	8.3669	0.563807	0.154227		5.34919	0.46074	0.151516		5.39078	0.348918	0.0800891		1.37087	0.137087	0.0325595		4.57245	0.737491	0.201059														0.563807	0.46074	0.348918	0.137087	0.737491					0.449609	0.100958
-10	14.5743	0.982097	0.268649		15.7257	1.3545	0.44543		8.97759	0.581074	0.133377		6.0184	0.60184	0.142943		8.25584	1.33159	0.363024														0.982097	1.3545	0.581074	0.60184	1.33159					0.970219	0.168157
0	22.2088	1.49655	0.409376		20.6864	1.78177	0.585942		24.5673	1.59012	0.364989		11.9735	1.19735	0.284382		8.93729	1.4415	0.392989														1.49655	1.78177	1.59012	1.19735	1.4415					1.50146	0.0955354
10	33.2057	2.23758	0.612081		25.8882	2.22981	0.733281		33.8078	2.18821	0.502272		18.5908	1.85908	0.44155		15.8344	2.55393	0.696266														2.23758	2.22981	2.18821	1.85908	2.55393					2.21372	0.110225
20	41.089	2.7688	0.757395		31.2974	2.69573	0.886497		39.3531	2.54713	0.584657		25.1466	2.51466	0.597255		21.3986	3.45139	0.940938														2.7688	2.69573	2.54713	2.51466	3.45139					2.79554	0.170503
30	45.8603	3.09032	0.845344		37.4655	3.227	1.06121		53.2637	3.44749	0.791323		30.0152	3.00152	0.71289		26.2264	4.23007	1.15322														3.09032	3.227	3.44749	3.00152	4.23007					3.39928	0.220895
40	49.4388	3.33146	0.911308		39.0304	3.36179	1.10554		57.9365	3.74994	0.860744		35.2523	3.52523	0.837277		22.8965	3.69298	1.0068														3.33146	3.36179	3.74994	3.52523	3.69298					3.53228	0.0844521
50	52.0288	3.50599	0.959049		39.7212	3.42129	1.1251		66.0098	4.27248	0.980687		40.7081	4.07081	0.966857		25.7225	4.14879	1.13106														3.50599	3.42129	4.27248	4.07081	4.14879					3.88387	0.17506
60	54.2504	3.65569	1		35.3045	3.04087	1		67.3098	4.35662	1		42.1035	4.21035	1		22.7418	3.66804	1														3.65569	3.04087	4.35662	4.21035	3.66804					3.78631	0.233644
Non-Tg + TIMP3	Peak	Peak density	I/Imax		Peak	Peak density	I/Imax		Peak	Peak density	I/Imax		Peak	Peak density	I/Imax		Peak	Peak density	I/Imax
-70	0.13	0.00876011	0.00190797		2.14127	0.184434	0.0383421		-0.894345	-0.0578864	-0.0110954		0.339627	0.0339627	0.00615913		1.33161	0.214775	0.052934														0.00876011	0.184434	-0.0578864	0.0339627	0.214775					0.0768091	0.0525486
-60	-5.92345	-0.399154	-0.0869367		3.04294	0.262096	0.0544874		-1.17556	-0.0760883	-0.0145843		1.09992	0.109992	0.0199471		1.79855	0.290089	0.0714959														-0.399154	0.262096	-0.0760883	0.109992	0.290089					0.0373869	0.127096
-50	-2.29992	-0.154981	-0.0337552		1.67658	0.144408	0.0300212		-1.54222	-0.0998198	-0.0191331		1.37369	0.137369	0.0249118		1.00922	0.162778	0.0401186														-0.154981	0.144408	-0.0998198	0.137369	0.162778					0.0379509	0.0681918
-40	-2.77842	-0.187225	-0.040778		-0.940183	-0.0809804	-0.0168351		1.23114	0.0796854	0.0152738		1.04701	0.104701	0.0189875		1.48458	0.239448	0.0590149														-0.187225	-0.0809804	0.0796854	0.104701	0.239448					0.0311257	0.0746372
-30	6.89829	0.464845	0.101244		2.4122	0.207769	0.0431934		2.86773	0.185613	0.0355776		2.35603	0.235603	0.0427265		0.891434	0.14378	0.0354363														0.464845	0.207769	0.185613	0.235603	0.14378					0.247522	0.0563678
-20	9.4331	0.635654	0.138447		5.95262	0.512715	0.106589		9.21666	0.596548	0.114344		3.06562	0.306562	0.055595		1.81499	0.292741	0.0721496														0.635654	0.512715	0.596548	0.306562	0.292741					0.468844	0.0719049
-10	25.9744	1.7503	0.381219		14.3536	1.23632	0.257019		18.9721	1.22797	0.235371		8.54069	0.854069	0.154885		2.95118	0.475997	0.117315														1.7503	1.23632	1.22797	0.854069	0.475997					1.10893	0.212992
0	27.3946	1.846	0.402063		23.6569	2.03763	0.423606		35.517	2.29883	0.440631		15.7793	1.57793	0.286157		5.84041	0.942001	0.232168														1.846	2.03763	2.29883	1.57793	0.942001					1.74048	0.23186
10	51.0524	3.44019	0.749281		29.6477	2.55363	0.530878		48.3738	3.13099	0.600135		28.1194	2.81194	0.509946		9.04628	1.45908	0.359608														3.44019	2.55363	3.13099	2.81194	1.45908					2.67917	0.339507
20	48.4594	3.26546	0.711224		42.6006	3.6693	0.762815		60.3792	3.90804	0.749077		39.7063	3.97063	0.720074		12.5765	2.02846	0.499939														3.26546	3.6693	3.90804	3.97063	2.02846					3.36838	0.357105
30	66.8026	4.50152	0.980442		46.7057	4.02288	0.836321		70.1047	4.53752	0.869734		48.5952	4.85952	0.881273		17.582	2.83581	0.698921														4.50152	4.02288	4.53752	4.85952	2.83581					4.15145	0.354993
40	70.56	4.75471	1.03559		54.3049	4.67743	0.972395		75.7444	4.90255	0.939701		53.2995	5.32995	0.966586		20.5431	3.31341	0.816631														4.75471	4.67743	4.90255	5.32995	3.31341					4.59561	0.339817
50	76.7678	5.17304	1.1267		59.6008	5.13358	1.06722		81.5041	5.27535	1.01116		56.245	5.6245	1.02		21.3745	3.44751	0.849681														5.17304	5.13358	5.27535	5.6245	3.44751					4.93079	0.380781
60	68.1352	4.59132	1		55.8466	4.81021	1		80.6048	5.21714	1		55.142	5.5142	1		25.156	4.05741	1														4.59132	4.81021	5.21714	5.5142	4.05741					4.83806	0.252184

## Sheet: Tau Activation
TgNotch3R169C										Average	sem
-20	91.6699	100.091	164.811	98.8444	97.3431	116.808	212.893			126.066	17.2859
0	73.7392	143.579	74.3936	72.6422	92.7676	66.0469	109.949			90.4454	10.5311
20	40.7244	41.3067	66.4674	66.0605	51.9364	47.2161	74.242			55.4219	5.08058
40	28.5286	31.9031	46.4007	48.5597	31.3675	41.9725	43.9619			38.9563	3.07784
60	22.1134	21.188	30.9574	35.1415	23.2544	34.5143	28.3875			27.9366	2.21404
TgNotch3R169C +ADAM17
-20	87.3046	95.3245	156.963	94.1375	102.343	110.968	234.183			125.889	20.0602
0	69.5653	135.452	70.1827	68.5304	115.818	62.7446	120.944			91.891	11.6283
20	36.6886	37.2133	59.8805	59.514	46.7895	44.8553	81.6662			52.3725	6.03354
40	25.9351	29.0029	42.1825	44.1452	28.5159	39.8739	48.3581			36.8591	3.35731
60	20.2503	19.4029	28.3493	32.1809	21.2953	32.7886	31.2263			26.4991	2.25775
TgNotch3R169C;Timp3+/-
-20	239.898	86.7472	85.8797	86.7764	117.247	98.0207	100.492	111.546		115.826	18.2016
0	148.194	69.3202	68.827	73.8938	90.6102	84.3924	66.5552	40.5763		80.2962	11.0136
20	71.4812	35.1518	34.8003	69.6725	69.0825	76.1226	23.4941	26.0785		50.7354	8.0367
40	38.9993	30.7302	30.4229	41.6663	50.7779	64.0462	18.0492	20.0346		36.8408	5.47139
60	24.0776	22.3971	22.1731	34.854	34.9386	40.5518	15.382	17.074		26.431	3.2522
Non-Tg
-20	133.161	182.662	164.811	91.3134	122.812					138.952	16.0355
0	75.2935	120.336	73.6918	66.4745	138.982					94.9556	14.5472
20	53.8264	97.9994	62.8745	57.7285	56.1474					65.7153	8.20674
40	47.8486	37.7193	44.2916	42.8208	34.2191					41.3799	2.41946
60	39.3463	24.3565	29.7667	31.2154	25.5543					30.0479	2.65035
Non-Tg + TIMP3
-20	137.156	188.142	173.051	94.0528	126.496					143.78	16.7932
0	77.5523	123.946	77.3764	68.4687	143.152					98.099	14.8784
20	55.4412	100.939	64.7608	59.4604	57.8318					67.6867	8.45294
40	48.6621	38.3606	45.0446	43.5488	34.8008					42.0834	2.46059
60	40.5267	25.0872	31.2551	32.1519	26.321					31.0684	2.7293

## Sheet: Tau deactivation
TgNotch3R169C										mean	sem
-20	37.2927	78.4314	79.1196	84.9791	123.538	80.8603	67.4687			80.7035	9.63057
0	34.5834	44.8864	31.3575	26.0514	29.1492	26.5868	39.0771			32.1025	2.61678
20	29.1707	32.2629	19.5387	20.4065	33.0734	26.0662	30.6098			26.7531	2.07993
40	30.9293	41.3844	21.7759	21.4805	28.6815	23.953	32.2208			28.0341	2.67629
60	29.2006	41.9765	21.0323	20.3788	27.651	24.2069	30.5681			27.4077	2.7791
TgNotch3R169C +ADAM17
-20	59.6325	80.3198	97.841	80.5625	105.163	94.6066	70.6172			86.3542	6.0751
0	32.9676	39.6527	32.17	39.4462	64.5208	31.1065	40.9007			40.1092	4.34326
20	22.8752	29.076	31.5401	23.5727	43.2015	30.4975	32.0383			30.1272	2.54886
40	21.9125	30.5991	24.2977	18.551	43.1888	28.025	33.7244			27.7624	3.11537
60	32.5275	21.7664	21.8412	21.8649	59.2431	28.322	31.9947			30.9275	5.02545
TgNotch3R169C;Timp3+/-
-20	87.2505	152.354	98.6784	52.686	55.3429	70.0245	43.5611	99.4582		86.0561	12.4998
0	33.523	44.6999	17.6456	31.404	28.57	41.8875	33.4186	32.7017		32.955	2.91038
20	37.021	31.811	17.2103	29.3396	51.6526	31.6296	21.2328	32.0615		33.1107	3.66283
40	30.5807	41.2889	19.3325	21.6875	26.9772	28.5661	24.6022	29.4622		28.0721	2.36415
60	31.2496	41.9492	17.5006	25.6819	18.5923	23.1904	25.5586	29.7745		26.3607	2.76363
Non-Tg
-20	98.3908	106.53	81.5799	66.2129	95.1031					89.5633	5.60539
0	32.3508	65.3596	25.0093	50.7963	36.54					42.0112	5.68619
20	31.7174	43.7631	19.5903	32.2738	40.3529					33.5395	3.3093
40	29.146	43.7503	20.6213	37.3954	33.333					32.8492	3.07698
60	29.4549	20.0133	19.5636	38.8491	34.0621					28.3886	3.01441
Non-Tg + TIMP3
-20	103.121	118.834	62.0347	79.2813	102.956					93.2453	7.93664
0	33.9061	74.8442	19.0175	60.8219	39.5571					45.6294	7.83983
20	33.2423	50.1137	14.8968	38.6437	43.6848					36.1163	4.73724
40	30.5472	43.7503	15.6808	44.7761	36.0853					34.1679	4.19417
60	30.871	30.0133	14.8765	46.5166	36.8746					31.8304	4.08039
